# Supplementary material
Source: publisher figshare collection journal article supplement (https://tandf.figshare.com/articles/dataset/_/21829415)
Supplement: Supplementary file [file 1]

## **Mobil mental sađlık: Zorlayıcı bir araştırma gündemi**

Miranda Olff

Mobil sađlık ('m-Sađlık') alanı çok hızlıca gelişmekte ve market üzerindeki psikolojik araçlarda büyük bir gelişme mevcuttur. Heyecan verici ileri teknolojik gelişmeler, semptomları tanımlayan, bireylere kendi mental sađlıklarını yönetmeye yardım etmekte, yardım aramaları için desteklemekte ve hem önleyici hem de teröpatik müdahaleler sağlamaktadır. Bu gelişim etkili ( uygun maliyet) bir yaklaşım olabilecek, bekleme listesini azaltabilecek ve küresel olarak ("g-Sađlık") insanların gözle görülür şekilde büyük çoğunluđına hizmet verebilecek potansiyele sahiptir. Buna rağmen, mobil uygulamaların (apps) az bir kısmı önemli şekilde değerlendirilmiştir. Geçerli tarama ve değerlendirme araçlarının nasıl olduđu, mobil müdahale uygulamalarının hangilerinin etkili olduđu, ya da yüz yüze görüşmelere kıyasla mobil uygulamaların ne derece iyi olduđuna dair çok az bilgi bulunmaktadır. Fakat politika oluşturucular, iş ortakları ve kullanıcılar tarafından gelen, bunların çabuk piyasaya sürülmense yönelik, artan taleplerle birlikte titiz bilimsel değerlendirme kadar mümkündür?

Bu yazıda, taramaya, değerlendirmeye, önlemeye ve tedaviye yönelik mobil sađlık araçlarının gelişimi travma ve TSSB alanından örneklerle gözden geçirilmiştir. Mobil sađlık araçlarının gelişimi ve değerlendirilmesindeki akademik zorluklar ele alınmaktadır. Toplum ve etik zorlukların (örn. eşitlik, kullanılabilirlik) ve yarından ziyade dünkü "App Store" daki olmasına yönelik market odaklı dileklerin bazılarının üstesinden gelebilecek uygun araştırma dizaynları üzerine kanıt temelli yönlendirmeye ihtiyaç duyulmaktadır.

Anahtar Kelimeler: e-Sađlık; mobil sađlık; m-Sađlık; akıllı telefon; mobil apps/ uygulamalar; küresel sađlık; travma; TSSB; depresyon; internet müdahale

**Citation:** European Journal of Psychotraumatology 2015, 6: 27882 - <http://dx.doi.org/10.3402/ejpt.v6.27882>
