# Supplementary material
Source: publisher figshare collection journal article supplement (https://tandf.figshare.com/articles/dataset/_/21829415)
Supplement: Supplementary file [file 1]

## **Mobilno mentalno zdravlje: izazov istraživačkom planu**

Miranda Olff

Polje mobilnog zdravstva ("m-zdravstvo") se brzo razvija i postoji eksplozivan rast psiholoških alata na tržištu. Uzbudljiv razvoj visokih tehnologija, koje prepoznaju simptome, pomaže pojedincima da rukovode svojim mentalnim zdravljem, hrabri ih da traže pomoć, i obezbeđuje i preventivne i terapijske intervencije. Ovakav razvoj ima potencijal da bude efikasan (cost-effective) pristup, redukujući liste čekanja i oblužujući značaj broj ljudi širom sveta ("g-zdravstvo"). Međutim, svega nekoliko mobilnih aplikacija (apps) je strogo kontrolisano. Postoji malo informacija o validnosti alatki za skrining i procenu, koje su od mobilnih apps za intervencije efikasne ili kako se mogu porediti mobilne apps sa licem u lice tretmanima. Ali koliko je izvodljiva stroga naučna evaluacija uz rastuće potrebe – od osiguranja, poslovnih partnera i korisnika- za njihovo brzo aktiviranje?

U ovom su radu pregledno prikazani razvoj alata za m-zdravstvo-ciljanje skrininga, procene, prevencije i tretmana- sa primerima iz oblasti traume i PTSP-a. Naglašeni su akademski izazovi u razvoju i evaluaciji m-zdravstvenih alatki. Smernice na osnovu dokaza su potrebne da bi se prevazišli neki opšti i etički izazovi (na pr. pravičnost, dostupnost) i želja vođena zahtevima tržišta da mobilne apps imamo dostupne u "app prodavnici" juče radije nego sutra.

**Ključne reči:** e-zdravstvo; m-zdravstvo; mobilne apps/aplikacije; globalno zdravlje; PTSP; depresija; intervencije inetrnetom

**Citation:** European Journal of Psychotraumatology 2015, 6: 27882 - <http://dx.doi.org/10.3402/ejpt.v6.27882>
